# Supplementary material for: Burden and Risk Factors for Unintentional Injuries in Tanzania: Findings from a Nationwide Population-based Survey
Source: Research Square preprint supplement (doi:10.21203/rs.3.rs-7199488/v1), 2025-09-10
Supplement: Supplementary file 1 [file 799e3037dcc4ac86fdd02d01.docx]

**Supplementary Table 1: Causes of non-RTC injuries requiring medical attention**

|  | **non-RTC injuries**  **n=333** | | | | |
| --- | --- | --- | --- | --- | --- |
| Fall | Cut | Animal bite | Burn | Others β |
|  | **%** | **%** | **%** | **%** | **%** |
| **Overall*** | **57.4** | **29.0** | **2.5** | **2.3** | **8.8** |
|  |  |  |  |  |  |
| **Sex** |  |  |  |  |  |
| Male | 58.2 | 2.0 | 29.0 | 2.0 | 8.8 |
| Female | 65.1 | 3.1 | 21.2 | 2.6 | 8.0 |
| **Age (years)** |  |  |  |  |  |
| 18-30 | 63.3 | 2.4 | 25.7 | 1.5 | 7.1 |
| 31-45 | 44.8 | 3.4 | 32.8 | 6.6 | 12.5 |
| 46-69 | 71.1 | 2.0 | 19.4 | 0.3 | 7.2 |
| **Setting** |  |  |  |  |  |
| Rural | 55.2 | 0.5 | 30.8 | 3.9 | 9.7 |
| Urban | 69.0 | 5.0 | 18.6 | 0.4 | 7.0 |
| **Location** |  |  |  |  |  |
| Home | 70.4 | 4.5 | 16.2 | 1.1 | 7.6 |
| School | 8.7 | 0.0 | 91.3 | 0.0 | 0.0 |
| Workplace | 24.7 | 1.2 | 58.1 | 5.5 | 10.5 |
| Road or street | 81.5 | 2.9 | 9.1 | 1.4 | 5.2 |
| Farm | 28.0 | 1.5 | 42.3 | 4.4 | 23.9 |
| Sports/athletic area | 97.8 | 0.0 | 0.0 | 0.0 | 2.2 |
| Others | 47.5 | 0.0 | 19.5 | 9.4 | 23.6 |
| **Marital Status** |  |  |  |  |  |
| Never married | 67.0 | 3.2 | 21.9 | 0.9 | 7.0 |
| Married/cohabiting | 51.5 | 1.8 | 32.7 | 2.7 | 11.3 |
| Separated/divorced/widowed | 74.4 | 2.9 | 14.8 | 3.7 | 4.2 |
| **Level of Education** |  |  |  |  |  |
| No formal | 72.6 | 1.2 | 16.1 | 3.8 | 6.3 |
| Primary | 58.1 | 2.0 | 28.8 | 1.1 | 9.9 |
| Secondary | 28.4 | 2.9 | 51.3 | 1.8 | 15.6 |
| College | 53.5 | 17.0 | 27.4 | 0.0 | 2.1 |
| **Occupation** |  |  |  |  |  |
| Employed | 20.7 | 0.0 | 33.9 | 7.6 | 37.8 |
| Self employed | 56.7 | 4.3 | 27.7 | 2.5 | 8.8 |
| Others** | 73.0 | 0.2 | 20.9 | 1.5 | 4.4 |
| **Depression status** |  |  |  |  |  |
| Not depressed | 50.9 | 1.9 | 32.8 | 3.5 | 10.9 |
| Depressed | 77.6 | 3.3 | 13.6 | 0.4 | 5.1 |
| **Alcohol consumption** |  |  |  |  |  |
| Ex/never drinker | 59.1 | 2.4 | 26.7 | 2.9 | 8.9 |
| Current drinker | 71.0 | 2.7 | 19.7 | 0.2 | 6.4 |
| **Motorcycle helmet use** |  |  |  |  |  |
| Always | 26.4 | 7.9 | 9.6 | 14.3 | 29.1 |
| Sometimes | 21.4 | 87.6 | 25.7 | 59.2 | 32.5 |
| Never | 52.2 | 4.5 | 64.7 | 26.4 | 38.4 |
| **Wearing seat belt** |  |  |  |  |  |
| Always | 8.4 | 49.2 | 11.5 | 23.5 | 29.0 |
| Sometimes | 25.2 | 24.7 | 27.1 | 8.3 | 15.1 |
| Never | 66.3 | 26.0 | 61.3 | 68.2 | 55.9 |
